# Supplementary material
Source: publisher site journal article supplement (https://www.spandidos-publications.com/217/downloadSupplementary)

Figure S2. The KEGG pathway map of *ITGA* genes in focal adhesion. KEGG, Kyoto Encyclopedia of Genes and Genomes; *ITGA*, integrin  $\alpha$ .

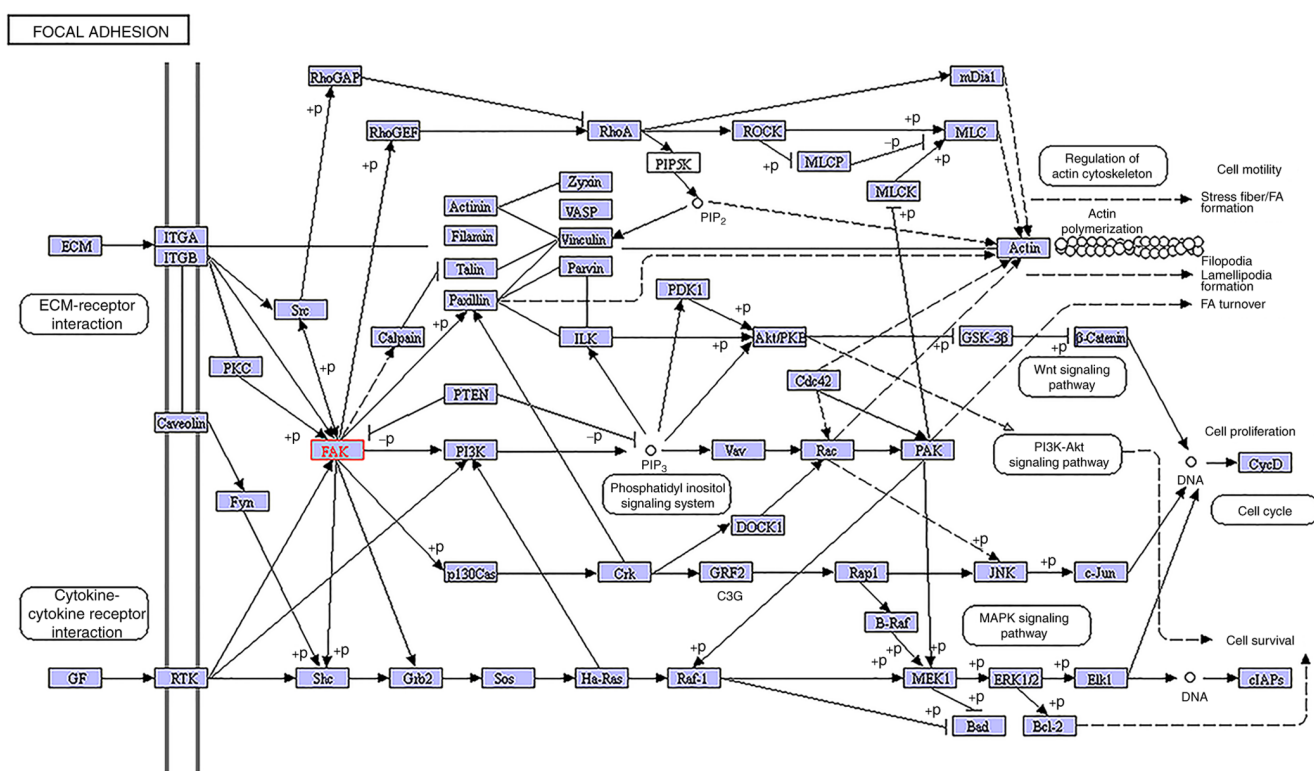

Supplement: Supplementary file 1 [file downloadSupplementary]
